# Supplementary material
Source: Springer Nature journal article supplement (https://www.springermedizin.de/resource/supplementary/12885_2008_1421_MOESM3_ESM.pdf/9473100)

A

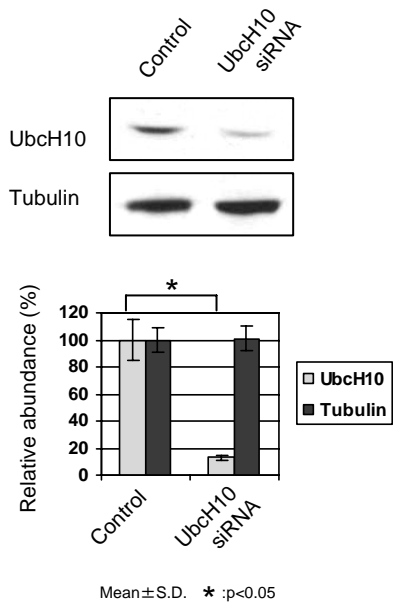

B

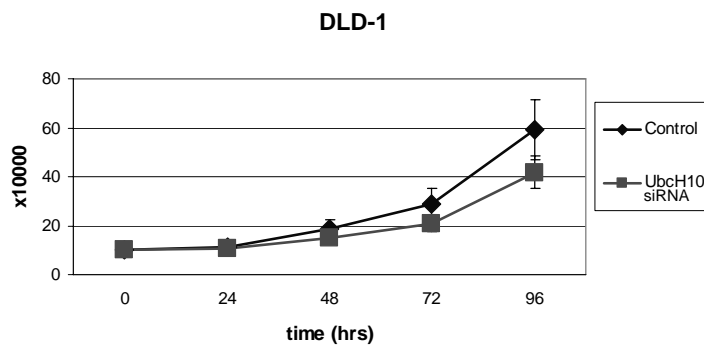

C

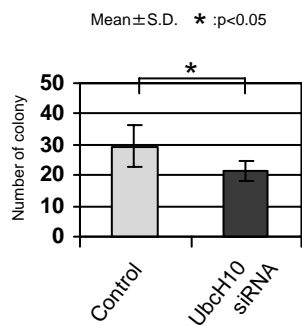

D

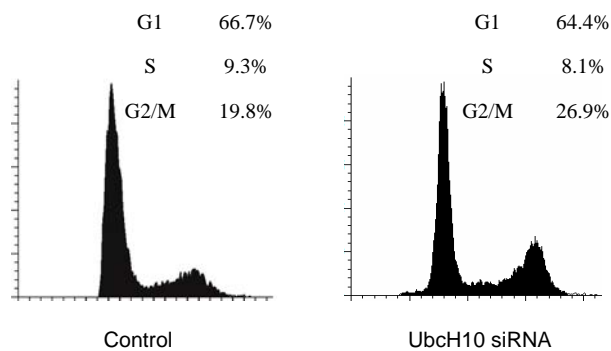

E

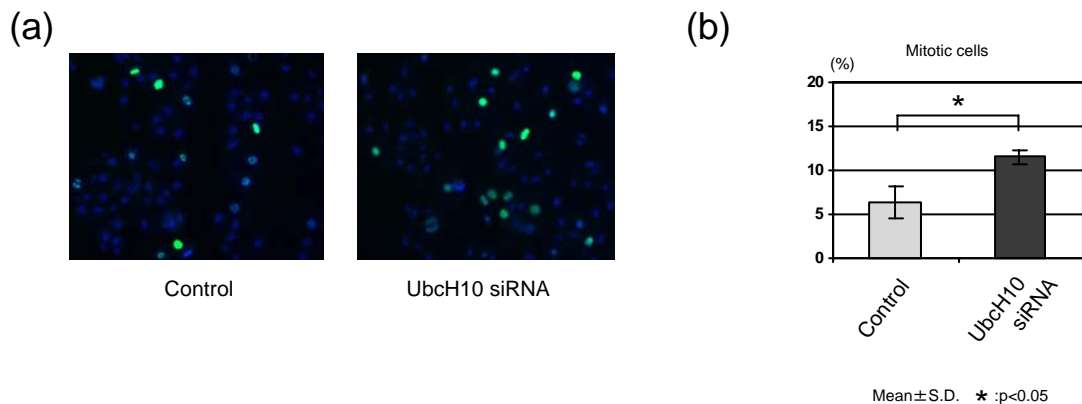

Supplement: MOESM3 [file 9473100]
